# Supplementary material for: Tackling Post-COVID-19 Rehabilitation Challenges: A Pilot Clinical Trial Investigating the Role of Robotic-Assisted Hand Rehabilitation
Source: MDPI journal article supplement (doi:10.3390/jcm13061543), 2024-03-07
Supplement: s1 [file s1]

**Table S1.** Results from the Barthel Index, the Manual Independence Function and SF-36 tests, and the active and passive joint range (in mm) measured using HandTutor. Initial and follow-up evaluation data with confidence intervals, p-values, and significance.

|                                              | Initial evaluation<br>Mean±SD [Q1, Q3] | Follow-up<br>Mean±SD [Q1, Q3] | Confidence<br>interval | p-value | Sig. |
|----------------------------------------------|----------------------------------------|-------------------------------|------------------------|---------|------|
| <b>BARTHEL INDEX (BI)</b>                    |                                        |                               |                        |         |      |
| Self-care index                              | 31.92±12.02 [21, 42]                   | 45.54±12.51 [44, 53]          | [-23.05, -3.68]        | 0.0093  | *    |
| Mobility index                               | 24.30±17.28 [10, 37]                   | 33.15±15.24 [25, 47]          | [-22.05, 4.36]         | 0.1793  |      |
| Total score                                  | 56.23±28.75 [31, 83]                   | 78.69±27.07 [69, 100]         | [-45.07, 0.15]         | 0.0514  |      |
| <b>Functional Independence Measure (FIM)</b> |                                        |                               |                        |         |      |
| Communication                                | 6.31±1.19 [5.5, 7]                     | 6.46±1.03 [7, 7]              | [-0.77, 0.47]          | 0.6206  |      |
| Locomotion                                   | 3.77±2.23 [1.25, 5]                    | 5.12±2.16 [4, 7]              | [-2.57, -0.12]         | 0.0318  | *    |
| Self-Care                                    | 4.22±1.99 [3, 6.25]                    | 5.89±1.74 [4, 7]              | [-2.27, -1.07]         | 0.0000  | *    |
| Social cognition                             | 6.59±0.94 [7, 7]                       | 6.69±0.77 [7, 7]              | [-0.49, 0.28]          | 0.5985  |      |
| Sphincter control                            | 5.38±2.10 [3, 7]                       | 6.38±1.47 [7, 7]              | [-2.01, 0.01]          | 0.0528  |      |
| Transfers                                    | 4.91±1.47 [2, 7]                       | 6.00±1.37 [4, 7]              | [-2.52, -0.45]         | 0.0054  | *    |
| Total                                        | 87.62±26.34 [62, 112]                  | 107.15±24.87 [102, 124]       | [-40.28, 1.20]         | 0.0636  |      |
| <b>SF-36</b>                                 |                                        |                               |                        |         |      |
| Bodily Pain (BP)                             | 55.19±34.32 [22.5, 87.5]               | 92.50±12.87 [90, 100]         | [-58.94, -15.68]       | 0.0022  | *    |
| General Health (GH)                          | 37.31±24.63 [20, 45]                   | 58.85±22.28 [45, 80]          | [-40.56, -2.52]        | 0.0281  | *    |
| Mental Health (MH)                           | 45.85±22.01 [36, 52]                   | 74.46±22.18 [60, 96]          | [-46.50, -10.73]       | 0.0030  | *    |
| Physical Functioning (PF)                    | 22.31±30.04 [0, 25]                    | 52.69±38.11 [15, 90]          | [-58.24, -2.52]        | 0.0339  | *    |
| Role Emotional (RE)                          | 10.26±28.50 [0, 0]                     | 51.28±48.33 [0, 100]          | [-73.55, -8.50]        | 0.0161  | *    |
| Role Physical (RP)                           | 7.69±27.74 [0, 0]                      | 34.62±43.94 [0, 75]           | [-56.96, 3.12]         | 0.0763  |      |
| Social Functioning (SF)                      | 25.00±28.41 [0, 37.5]                  | 66.35±38.32 [37.5, 100]       | [-68.78, -13.92]       | 0.0049  | *    |
| Vitality (VT)                                | 40.77±21.30 [30, 55]                   | 68.08±24.54 [55, 85]          | [-45.93, -8.69]        | 0.0059  | *    |
| <b>Active flexion (mm)</b>                   |                                        |                               |                        |         |      |
| Thumb                                        | 7.93±5.69 [3.00, 12.50]                | 15.38±7.27 [11, 20]           | [-12.62, -2.28]        | 0.0067  | *    |
| Index                                        | 11.47±5.90 [8.50, 15.50]               | 17.38±5.85 [13, 21]           | [-10.50, -1.34]        | 0.0134  | *    |
| Middle                                       | 14.80±6.82 [12.00, 20.50]              | 20.15±7.67 [20, 26]           | [-11.05, 0.34]         | 0.0642  |      |
| Ring                                         | 12.93±6.11 [12.93, 20.50]              | 19.54±8.85 [17, 27]           | [-12.67, -0.54]        | 0.0343  | *    |
| Little                                       | 7.87±4.39 [5.50, 11.00]                | 14.92±7.82 [12, 19]           | [-12.19, -1.92]        | 0.0097  | *    |
| <b>Passive flexion (mm)</b>                  |                                        |                               |                        |         |      |
| Thumb                                        | 15.07±6.55 [11.0, 19.0]                | 19.46±4.74 [16.0, 23.0]       | [-8.80, 0.01]          | 0.0507  |      |
| Index                                        | 17.80±5.25 [14.0, 21.5]                | 21.38±5.22 [18.0, 24.0]       | [-7.67, 0.50]          | 0.0826  |      |
| Middle                                       | 20.67±3.75 [18.0, 24.0]                | 25.00±5.34 [21.0, 29.0]       | [-8.01, -0.65]         | 0.0231  | *    |
| Ring                                         | 18.67±4.27 [16.0, 22.0]                | 24.85±6.22 [22.0, 29.0]       | [-10.44, -1.92]        | 0.0066  | *    |
| Little                                       | 12.67±4.03 [11.0, 15.0]                | 18.69±6.29 [16.0, 21.0]       | [-10.26, -1.79]        | 0.0077  | *    |

\* indicates significant differences identified by a paired t-test at the p<0.05 level.
